# Supplementary material for: Enniatin and Beauvericin Biosynthesis in Fusarium Species: Production Profiles and Structural Determinant Prediction
Source: PubMed Central journal article supplement (PMC5331425; doi:10.3390/toxins9020045), 2017-01-25
Supplement: toxins-09-00045-s001.pdf [file toxins-09-00045-s001.pdf]

## Supplementary Materials: Enniatin and Beauvericin Biosynthesis in *Fusarium* Species: Production Profiles and Structural Determinant Prediction

Vania C. Liuzzi, Valentina Mirabelli, Maria Teresa Cimmarusti, Miriam Haidukowski, John F. Leslie, Antonio F. Logrieco, Rocco Caliandro, Francesca Fanelli and Giuseppina Mulè

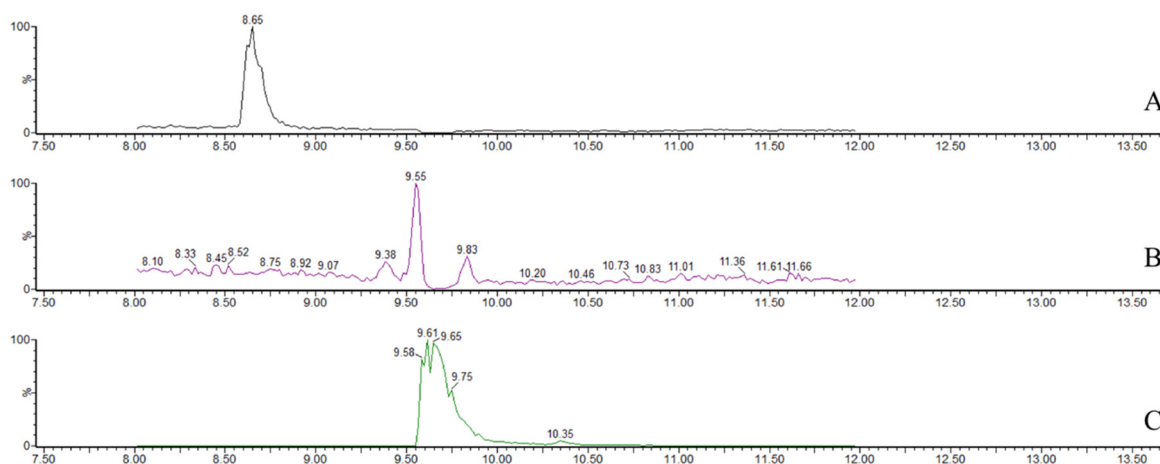

**Figure S1.** UPLC/PDA chromatogram of the agar extract from the sample *Fusarium proliferatum* KSU 4854 grown on chemically-defined production medium (FDM). (A) SIR of ENN B (0.058 µg/g), (B) ENN B<sub>1</sub> (0.3 µg/g) and (C) BEA (4.8 µg/g).

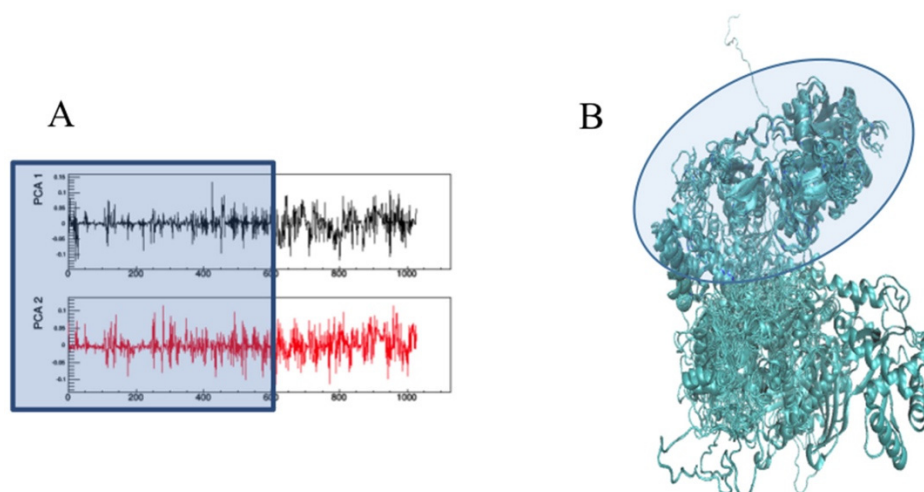

**Figure S2.** (A) Loading plot obtained by processing the protein angular value (PAV) profiles of the segment A of the ESYN1 sequences of the 13 *Fusarium* isolates, with the selected region of minimal variations highlighted. (B) Overlap of the corresponding structural models of segment A, performed according to the positions of the C $\alpha$  atoms lying in the selected region (highlighted).

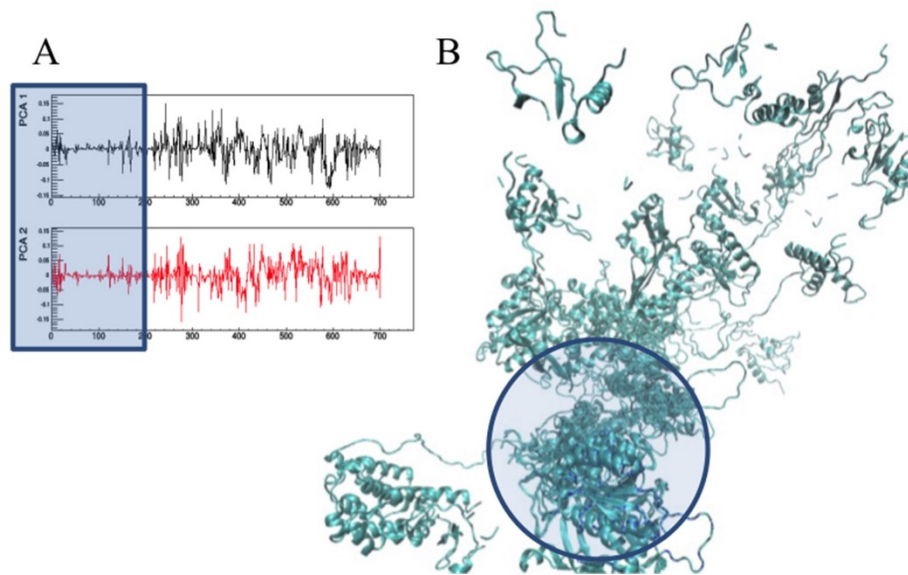

**Figure S3.** (A) Loading plot obtained by processing the PAV profiles of segment B of the ESYN1 sequences of the 13 *Fusarium* isolates, with the selected region of minimal variations highlighted. (B) Overlap of the corresponding structural models of segment B, performed according to the positions of the C $\alpha$  atoms lying in the selected region (highlighted).

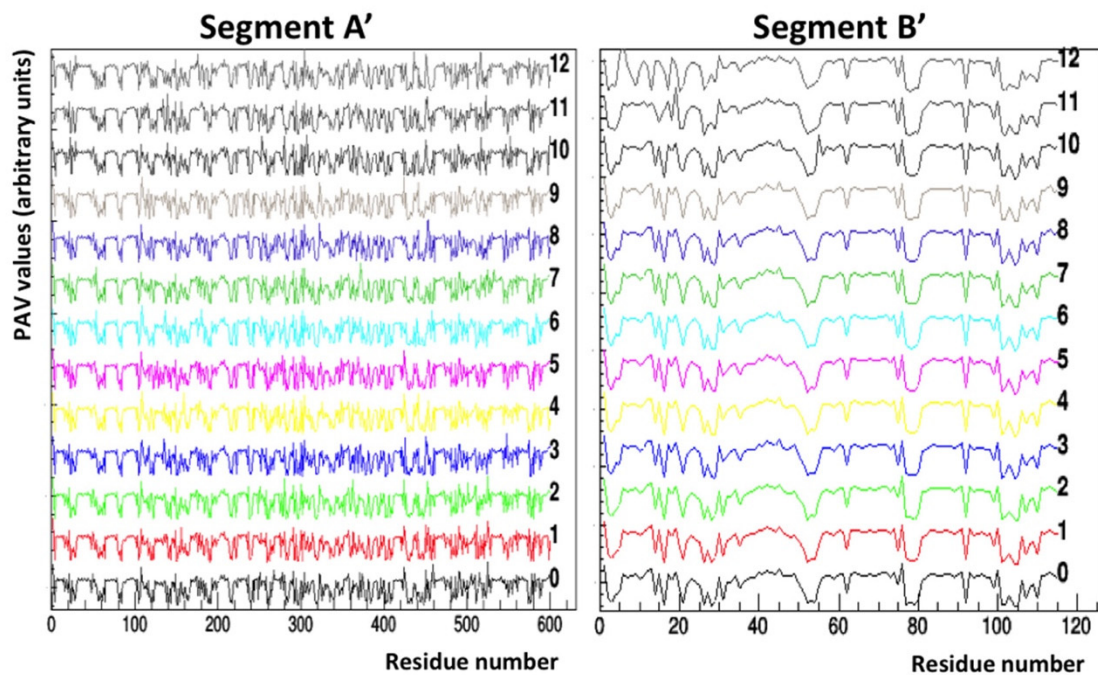

**Figure S4.** PAV profiles calculated for the ESYN1 sequences of the 13 *Fusarium* isolates, shown separately for segment A' (left) and B' (right). The samples' numbering follows that indicated in Table 2.

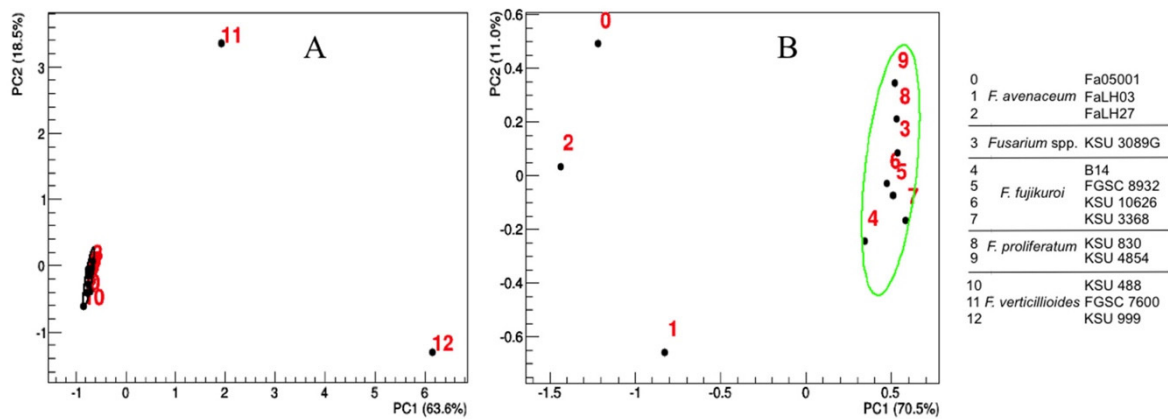

**Figure S5.** Score plots of the first two principal components (PC1 and PC2) obtained by applying principal component analysis (PCA) to the segment B' of (A) all 13 ESYN1 sequences of *Fusarium* isolates and of (B) the subset constituted by eliminating the *Fusarium verticillioides* strains (Samples 10, 11, 12). The percentage of data variance explained by each principal component is reported on the corresponding axis labels. The 95% confidence level ellipses indicate the results of hierarchical clustering.

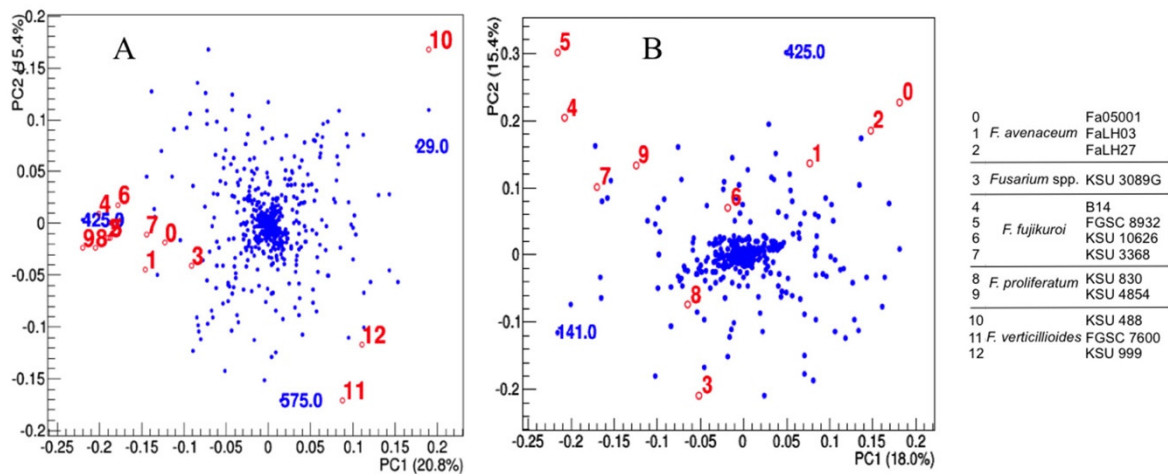

**Figure S6.** Score (red dots) and loading (blue dots) plots of the first two principal components obtained after application of PCA to the segment A' of (A) all 13 ESYN1 sequences of *Fusarium* isolates and of (B) the subset constituted by eliminating the *Fusarium verticillioides* strains (Samples 10, 11, 12). The percentage of data variance explained by each principal component is reported on the corresponding axis labels. The residue number of the loadings more distant from the (0, 0) point is reported.

**Table S1.** Enniatin and beauvericin production of *Fusarium* strains on chemically-defined production medium (FDM).

| Species                         | Strain       | ENN B<br>( $\mu\text{g}/\text{kg}$ ) | ENN B <sub>1</sub><br>( $\mu\text{g}/\text{g}$ ) | ENN A<br>( $\mu\text{g}/\text{kg}$ ) | ENN A <sub>1</sub><br>( $\mu\text{g}/\text{kg}$ ) | BEA<br>( $\mu\text{g}/\text{g}$ ) |
|---------------------------------|--------------|--------------------------------------|--------------------------------------------------|--------------------------------------|---------------------------------------------------|-----------------------------------|
| <i>Fusarium fujikuroi</i>       | B14          | 105 ± 16                             | 0.9 ± 0.3                                        | n.d.                                 | n.d.                                              | 50 ± 17                           |
| <i>Fusarium fujikuroi</i>       | FGSC 8932 *  | 189 ± 60                             | 0.3 ± 0.2                                        | 116 ± 84                             | n.d.                                              | 16 ± 20                           |
| <i>Fusarium fujikuroi</i>       | KSU 10626 *  | 94 ± 29                              | 0.3 ± 0.1                                        | 76 ± 74                              | n.d.                                              | 17 ± 4                            |
| <i>Fusarium fujikuroi</i>       | KSU 3368 *   | 151 ± 39                             | 0.6 ± 0.2                                        | 43 ± 22                              | n.d.                                              | 50 ± 16                           |
| <i>Fusarium verticillioides</i> | FGSC 7600    | 91 ± 11                              | 0.1 ± 0.1                                        | 78 ± 36                              | n.d.                                              | n.d.                              |
| <i>Fusarium verticillioides</i> | ITEM 10027 * | 72 ± 12                              | 0.1 ± 0.1                                        | 45 ± 20                              | n.d.                                              | n.d.                              |
| <i>Fusarium verticillioides</i> | KSU 488      | 54 ± 1                               | n.d.                                             | n.d.                                 | n.d.                                              | n.d.                              |
| <i>Fusarium verticillioides</i> | KSU 999      | 68 ± 3                               | n.d.                                             | 85 ± 84                              | n.d.                                              | n.d.                              |
| <i>Fusarium spp.</i>            | KSU 3089G *  | 44 ± 8                               | 0.1 ± 0.1                                        | n.d.                                 | n.d.                                              | n.d.                              |
| <i>Fusarium proliferatum</i>    | KSU 830 *    | 39 ± 3                               | n.d.                                             | 21 ± 23                              | n.d.                                              | n.d.                              |
| <i>Fusarium proliferatum</i>    | KSU 4854 *   | 80 ± 30                              | 0.2 ± 0.1                                        | n.d.                                 | n.d.                                              | 4.9 ± 4                           |
| <i>Fusarium avenaceum</i>       | ITEM 3403    | 310 ± 57                             | 32 ± 6                                           | n.d.                                 | 3 ± 0                                             | 0.8 ± 0.4                         |
| <i>Fusarium avenaceum</i>       | ITEM 3404    | 230 ± 82                             | 33 ± 12                                          | 3 ± 1                                | 3 ± 1                                             | 06 ± 0.4                          |

n.d. = not detected; \* results confirmed in LC/MS. ENN B = enniatin B; ENN B<sub>1</sub> = enniatin B<sub>1</sub>; ENN A = enniatin A; ENN A<sub>1</sub> = enniatin A<sub>1</sub>; BEA = beauvericin. Detection limit: ENN B = 6 ng/g; ENN B<sub>1</sub> = 7 ng/g; ENN A = 15 ng/g; ENN A<sub>1</sub> = 50 ng/g; BEA = 4 ng/g.

**Table S2.** Enniatin and beauvericin production of *Fusarium* strains on potato dextrose agar (PDA) medium.

| Species                         | Strain       | ENN B<br>( $\mu\text{g}/\text{kg}$ ) | ENN B <sub>1</sub><br>( $\mu\text{g}/\text{g}$ ) | ENN A<br>( $\mu\text{g}/\text{kg}$ ) | ENN A <sub>1</sub><br>( $\mu\text{g}/\text{kg}$ ) | BEA<br>( $\mu\text{g}/\text{g}$ ) |
|---------------------------------|--------------|--------------------------------------|--------------------------------------------------|--------------------------------------|---------------------------------------------------|-----------------------------------|
| <i>Fusarium fujikuroi</i>       | B14 *        | 86 ± 58                              | 1.4 ± 0.3                                        | 83 ± 57                              | n.d.                                              | 101 ± 15                          |
| <i>Fusarium fujikuroi</i>       | FGSC 8932 *  | 478 ± 78                             | 0.7 ± 0.2                                        | 575 ± 484                            | n.d.                                              | 100 ± 17                          |
| <i>Fusarium fujikuroi</i>       | KSU 10626 *  | 398 ± 220                            | 0.5 ± 0.2                                        | 240 ± 217                            | n.d.                                              | 27 ± 8                            |
| <i>Fusarium fujikuroi</i>       | KSU 3368 *   | 245 ± 65                             | 0.3 ± 0.1                                        | 73 ± 18                              | n.d.                                              | 33 ± 7                            |
| <i>Fusarium verticillioides</i> | FGSC 7600 *  | 244 ± 20                             | 0.2 ± 0.3                                        | 168 ± 13                             | n.d.                                              | n.d.                              |
| <i>Fusarium verticillioides</i> | ITEM 10027 * | 245 ± 52                             | 0.1 ± 0.1                                        | 272 ± 83                             | n.d.                                              | n.d.                              |
| <i>Fusarium verticillioides</i> | KSU 488      | 144 ± 30                             | 0.1 ± 0.0                                        | 222 ± 41                             | n.d.                                              | n.d.                              |
| <i>Fusarium verticillioides</i> | KSU 999      | 168 ± 12                             | 0.1 ± 0.0                                        | 264 ± 63                             | n.d.                                              | n.d.                              |
| <i>Fusarium spp.</i>            | KSU 3089G    | 316 ± 73                             | 0.1 ± 0.0                                        | 97 ± 116                             | n.d.                                              | n.d.                              |
| <i>Fusarium proliferatum</i>    | KSU 830 *    | 125 ± 19                             | 0.3 ± 0.0                                        | 225 ± 77                             | n.d.                                              | n.d.                              |
| <i>Fusarium proliferatum</i>    | KSU 4854     | 250 ± 26                             | 0.2 ± 0.0                                        | n.d.                                 | n.d.                                              | 7.5 ± 3                           |
| <i>Fusarium avenaceum</i>       | ITEM 3403    | 383 ± 143                            | 107 ± 36                                         | 15 ± 11                              | 9 ± 3                                             | 1 ± 2                             |
| <i>Fusarium avenaceum</i>       | ITEM 3404    | 122 ± 20                             | 26 ± 9                                           | 183 ± 53                             | 3 ± 3                                             | 14 ± 6                            |

n.d. = not detected; \* results confirmed in LC/MS. ENN B = enniatin B; ENN B<sub>1</sub> = enniatin B<sub>1</sub>; ENN A = enniatin A; ENN A<sub>1</sub> = enniatin A<sub>1</sub>; BEA = beauvericin. Detection limit: ENN B = 6 ng/g; ENN B<sub>1</sub> = 7 ng/g; ENN A = 15 ng/g; ENN A<sub>1</sub> = 50 ng/g; BEA = 4 ng/g.
